# Supplementary material for: Hydrogen evolution reaction of Ben + H2O (n = 5–9) based on density functional theory
Source: Royal Society of Chemistry journal article supplement (doi:10.1039/d2cp04647d), 2022-11-29
Supplement: d2cp04647d1.pdf [file d2cp04647d1.pdf]

To understand how water molecules are adsorbed by clusters. After we scan the potential energy surface between the adsorbed water molecule clusters, the specific results are shown in Figure S1, Figure S2, Figure S3, Figure S4, Figure S5. The results show that the adsorption reaction has no energy barrier.

## Flexible scanning

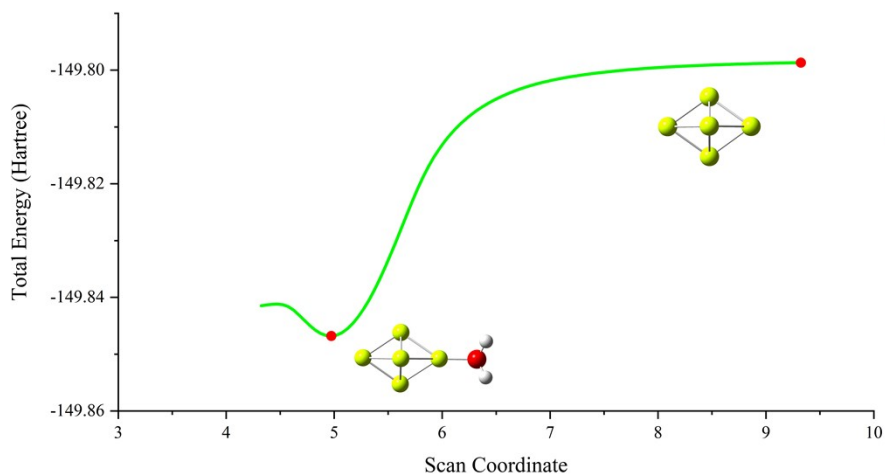

**Fig. 1S** Flexible scanning of Be<sub>5</sub> clusters with H<sub>2</sub>O, the energies are calculated at the PBE0-D3/ Def2TZVP level.

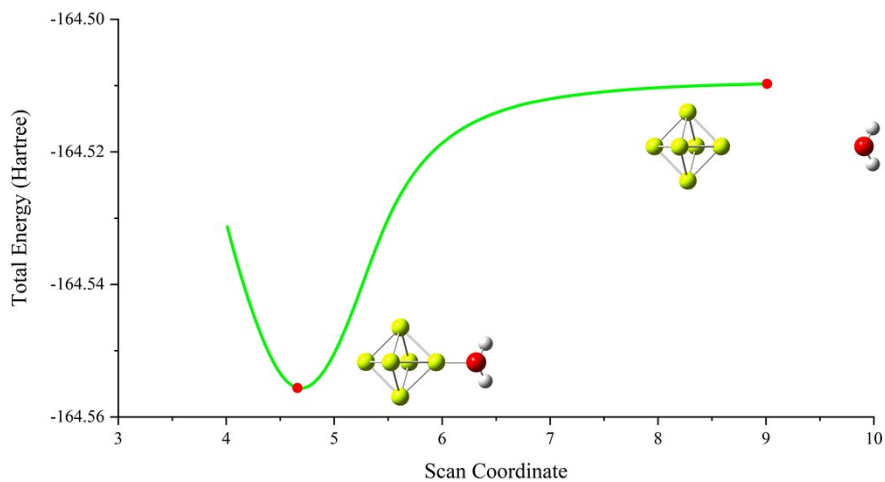

**Fig. 2S** Flexible scanning of Be<sub>6</sub> clusters with H<sub>2</sub>O, the energies are calculated at the PBE0-D3/ Def2TZVP level.

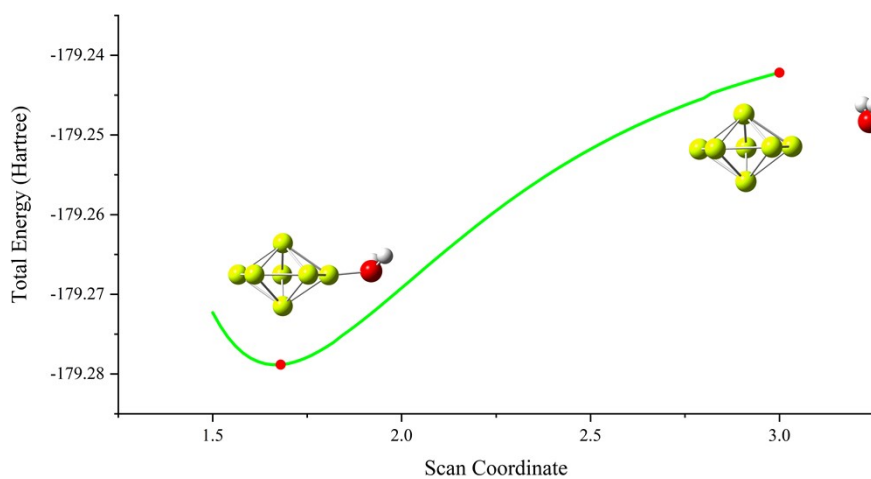

**Fig. 3S** Flexible scanning of Be<sub>7</sub> clusters with H<sub>2</sub>O, the energies are calculated at the PBE0-D3/ Def2TZVP level.

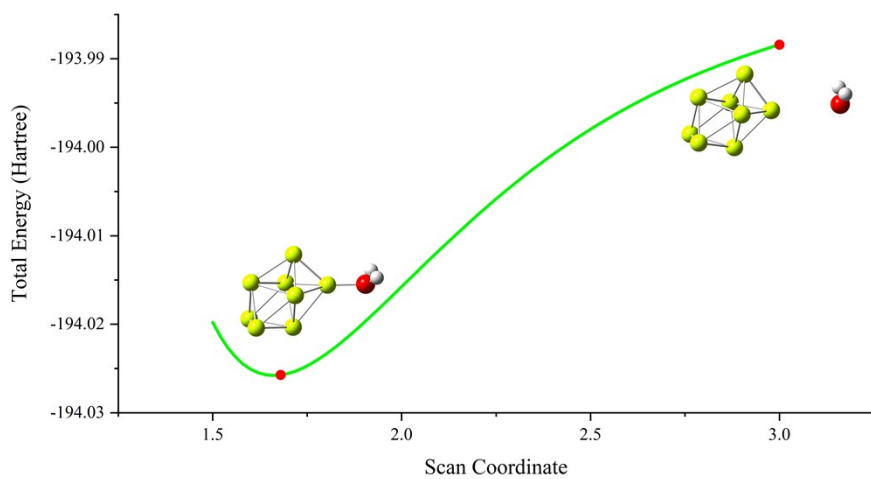

**Fig. 4S** Flexible scanning of Be<sub>8</sub> clusters with H<sub>2</sub>O, the energies are calculated at the PBE0-D3/ Def2TZVP level.

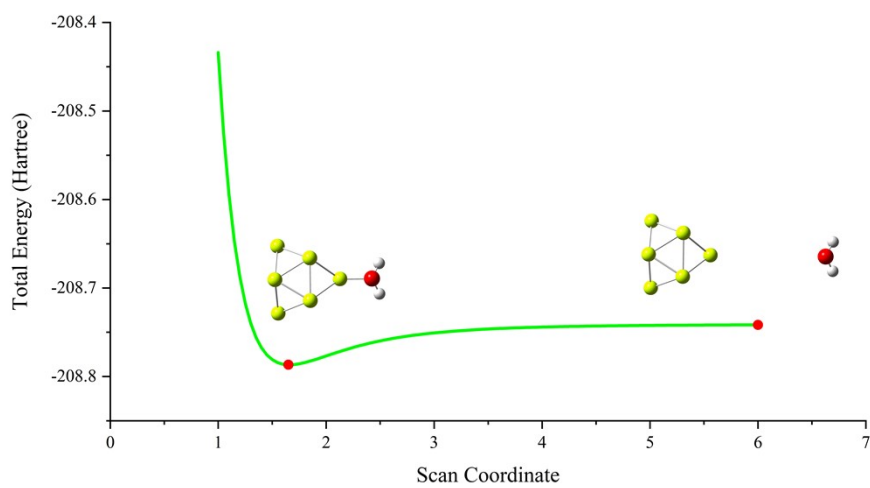

**Fig. 5S** Flexible scanning of Be<sub>9</sub> clusters with H<sub>2</sub>O, the energies are calculated at the PBE0-D3/ Def2TZVP level.
